# Supplementary material for: Patient-specific genomics and cross-species functional analysis implicate LRP2 in hypoplastic left heart syndrome
Source: eLife journal article supplement (doi:10.7554/elife.59554), 2020-10-02

A

Loss of function strategy:  
Heart-specific (*Hand4.2 driver*) RNAi  
of 5H genes in post-mitotic CMs

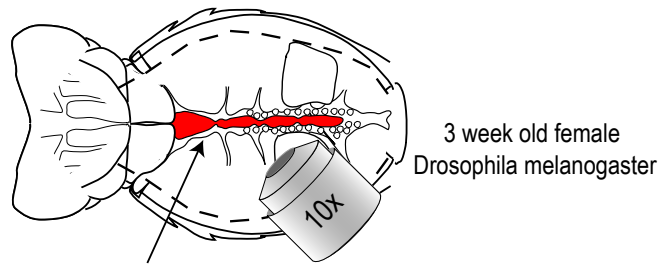

Kinetic imaging (30s@140fps) followed by automated  
and quantitative assessment of heart size and function

B

| human gene    | DIOPT* score | fly gene       | heart phenotypes     | NKX2-5 / tin interaction phenotype |
|---------------|--------------|----------------|----------------------|------------------------------------|
| <i>HSPG2</i>  | 9            | <i>trol</i>    | -/-                  | constriction                       |
| <i>APOB</i>   | 6            | <i>apolpp</i>  | arrhythmic           | -/-                                |
| <i>LRP2</i>   | 11           | <i>mg1</i>     | dilation, arrhythmic | -/-                                |
| <i>SLC9A1</i> | 5            | <i>Nhe2</i>    | -/-                  | -/-                                |
| <i>SDHD</i>   | 12           | <i>SdhD</i>    | -/-                  | constriction                       |
| <i>JPT1</i>   | 3            | <i>Jupiter</i> | -/-                  | -/-                                |
| <i>JPT1</i>   | 2            | <i>CG1943</i>  | dilation             | -/-                                |
| <i>ELF4</i>   | 5            | <i>Eip74EF</i> | -/-                  | -/-                                |
| <i>HS6ST2</i> | 9            | <i>Hs6st</i>   | -/-                  | -/-                                |
| <i>SIK1</i>   | 3            | <i>Sik2</i>    | -/-                  | -/-                                |

Wilcoxon rank sum test,  $p < 0.05$

C

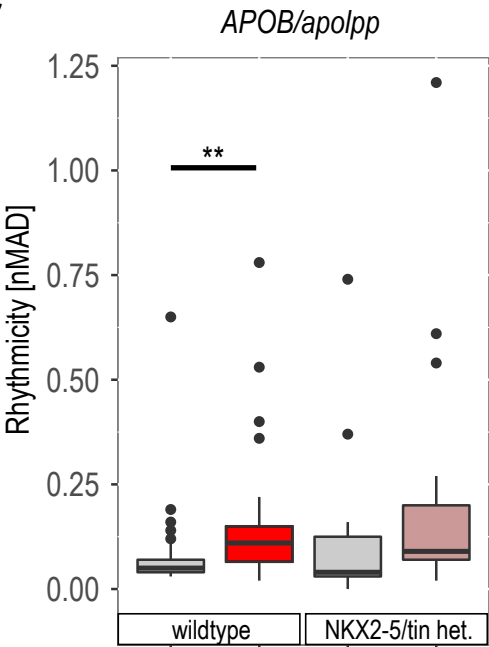

D

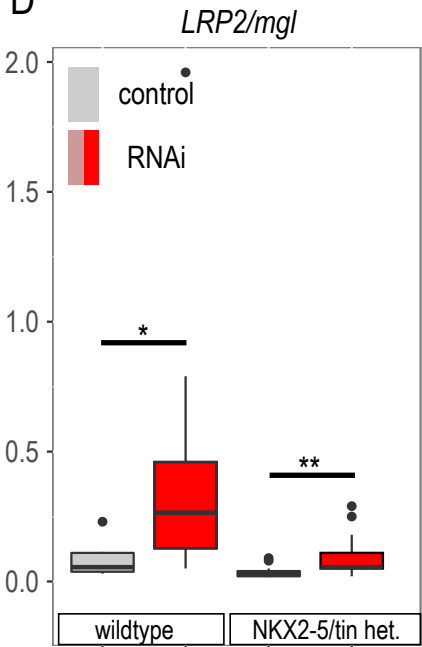

E

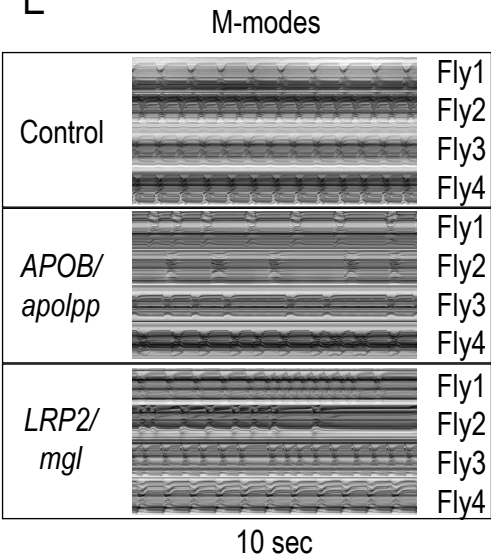

F

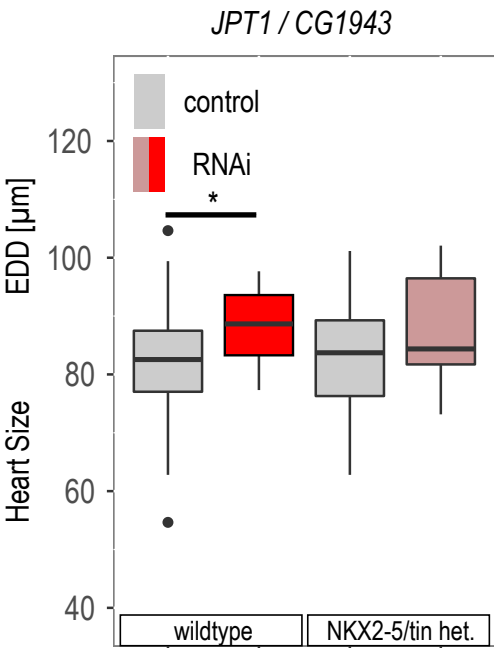

G

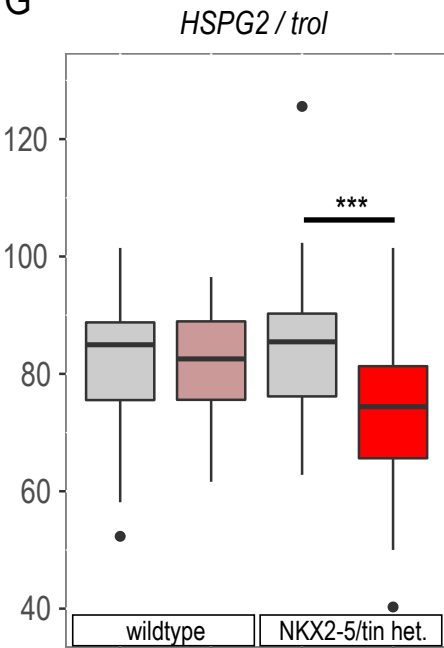

H

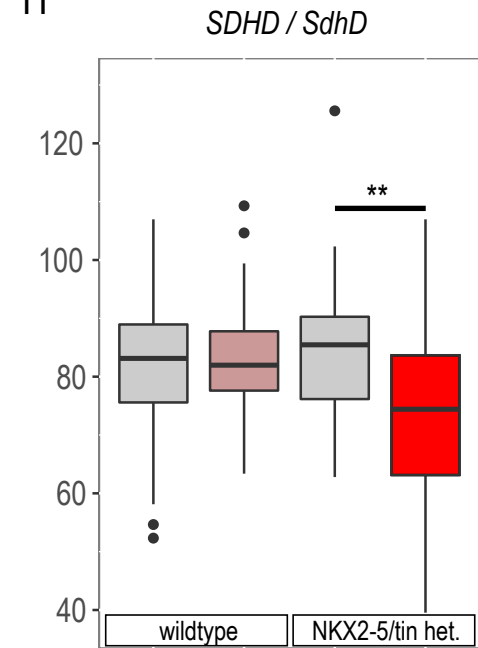

Supplement: supp [file elife-59554-supp-v1.zip]
