# Supplementary material for: Patient-specific genomics and cross-species functional analysis implicate LRP2 in hypoplastic left heart syndrome
Source: eLife journal article supplement (doi:10.7554/elife.59554), 2020-10-02
Supplement: supp [file elife-59554-supp-v1.zip]

**Supplemental Table 8. Case-Control Association Analysis of Rare Variants in *LRP2***

|                                                                                                                        | CAVA | HLHS (n=117) |                |         | Controls (n=861) |                |         | p_value |
|------------------------------------------------------------------------------------------------------------------------|------|--------------|----------------|---------|------------------|----------------|---------|---------|
|                                                                                                                        |      | Total SNVs   | Total Subjects |         | Total SNVs       | Total Subjects |         |         |
| Total number of variants (no predicted-damaging threshold)                                                             | All  | 1568         | 117            | 100.00% | 10772            | 861            | 100.00% | 0.0035  |
| Missense                                                                                                               | NSY  | 31           | 29             | 24.80%  | 147              | 142            | 16.50%  | 0.0178  |
| Splice Region Intron                                                                                                   | SS   | 2            | 2              | 1.70%   | 19               | 19             | 2.20%   | 0.2206  |
| Splice Region: Inframe, Missense, Synonymous                                                                           | EE   | 2            | 2              | 1.70%   | 16               | 16             | 1.90%   | 1       |
| Synonymous                                                                                                             | SY   | 15           | 14             | 12.00%  | 83               | 79             | 9.20%   | 0.1545  |
| 1 KB Upstream                                                                                                          | N/A  | 4            | 4              | 3.40%   | 18               | 18             | 2.10%   | 0.2976  |
| 5' untranslated region                                                                                                 | 5PU  | 0            | 0              | 0.00%   | 1                | 1              | 0.10%   | 0.5567  |
| 3' untranslated region                                                                                                 | 3PU  | 10           | 7              | 6.00%   | 38               | 37             | 4.30%   | 0.0934  |
| Intron                                                                                                                 | INT  | 1504         | 117            | 100.00% | 10450            | 861            | 100.00% | 0.0082  |
| Variant lies within an within active histone marks from<br>ChIPSeq data confined to human cardiovascular tissue (n=21) | N/A  | 53           | 39             | 33.30%  | 374              | 285            | 33.10%  | 0.6301  |
| Variant lies within an within active histone marks from<br>ChIPSeq data confined to human fetal heart (n=3)            | N/A  | 25           | 22             | 18.80%  | 158              | 149            | 17.30%  | 0.5692  |
| Variant lies within a transcription factor binding site                                                                | N/A  | 94           | 60             | 51.30%  | 590              | 394            | 45.80%  | 0.1847  |
