# Supplementary material for: Patient-specific genomics and cross-species functional analysis implicate LRP2 in hypoplastic left heart syndrome
Source: eLife journal article supplement (doi:10.7554/elife.59554), 2020-10-02

# A

## Negative Regulation of Cell Proliferation

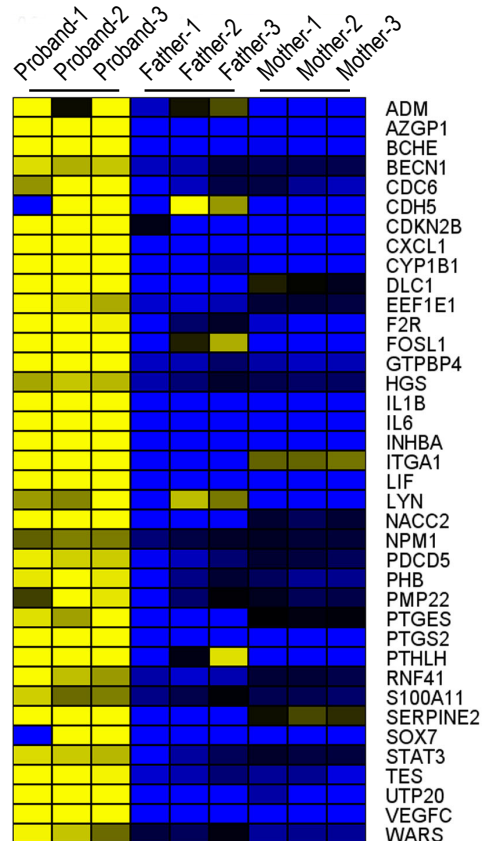

# B

## Cell Cycle Arrest

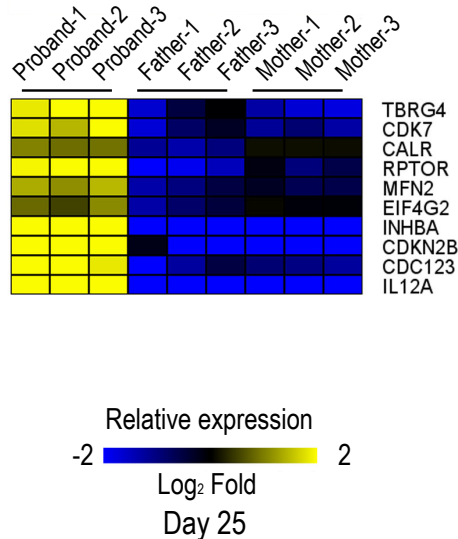

# C

## Positive Regulation of Apoptosis

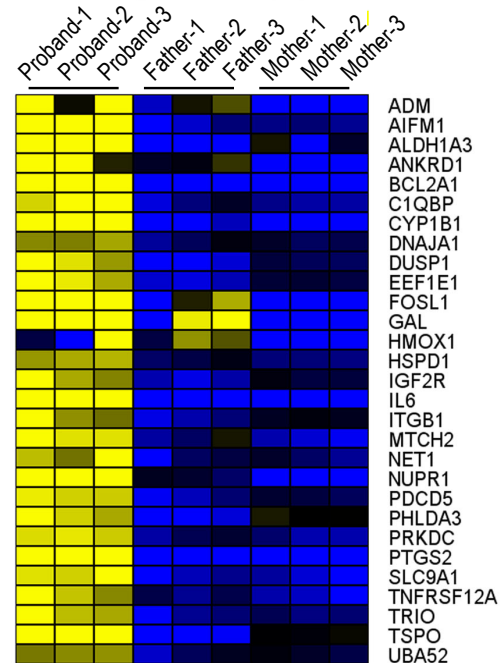

Supplement: supp [file elife-59554-supp-v1.zip]
