# Supplementary material for: Patient-specific genomics and cross-species functional analysis implicate LRP2 in hypoplastic left heart syndrome
Source: eLife. 2020 Oct 2;9:e59554. doi: 10.7554/eLife.59554 (PMC7581429; doi:10.7554/eLife.59554)
Supplement: Supplementary file 6. [file elife-59554-supp6.xlsx]

## Sheet: gene_level_results
Supplemental Table 6. SKAT-O Analysis of 2 prioritized candidate genes in cases and controls
gene	chrom	start	stop	skat.p.value	burden.p.value	burden.Q	skat.test.type	burden.test.type	nSNP	case.variant.count	control.variant.count	VQSR.PASS	CAVA_CLASS.ESS	CAVA_CLASS.FS	CAVA_CLASS.NSY	CAVA_CLASS.SG	CAVA_CLASS.SL
LRP2	2	169127109	169362685	0.000804841	0.000439955	19986.1	moments.matching	binary	26	14	29	26	0	0	26	0	0
APOB	2	21001429	21044073	0.231382	0.653282	474.94	moments.matching	binary	22	8	67	22	0	0	20	2	0
