# Supplementary material for: Patient-specific genomics and cross-species functional analysis implicate LRP2 in hypoplastic left heart syndrome
Source: eLife. 2020 Oct 2;9:e59554. doi: 10.7554/eLife.59554 (PMC7581429; doi:10.7554/eLife.59554)
Supplement: Supplementary file 7. [file elife-59554-supp7.xlsx]

## Sheet: Sheet1
Supplemental Table 7. Rare, predicted-damaging LRP2 missense variants in cases and controls (CADD>24)
IID	var	Cohort	Ancestral Caucasian Alleles (%)	Chromosome:base pair position	REF	ALT	Amino Acid Change (ENST00000263816)	Domain	CADD	GNOMAD MAF (%)	GNOMAD MAF African American (%)	GNOMAD MAF European American (Non-Finnish) (%)	Cardiac phenotype (MS, mitral stenosis; MA, mitral atresia; AS, aortic stenosis; AA, aortic atresia; AVC, atrioventricular canal; HLV, hypoplastic left ventricle; DORV, double-outlet right ventricle; HF, heart failure ≤ age 2)
s_3595-ST-0038	1	Control	98.9	chr2.169145760	T	G	R4325S	NO	29.9	0	0	0
s_005-HLH-001	1	Case	53.4	chr2.169185735	T	C	N3205D	NO	27.8	0.414	0.076	0.42	HLHS (MA/AA), HF
s_3595-ST-0543	1	Control	97.1	chr2.169166027	C	T	R3888H	LDL-receptor class A 35	35	0.095	0.7	0.03
s_007-HLH-001	1	Case	78.8	chr2.169182251	C	T	R3305H	LDL-receptor class B 29	26	0.391	0.024	0.016	HLHS (MS/AS)
s_3595-ST-0539	1	Control	98	chr2.169170603	C	A	W3776C	LDL-receptor class A 32	34	0.004	0	0.007
s_3595-ST-0583	1	Control	99	chr2.169170610	G	A	S3774L	LDL-receptor class A 32	26.8	0.004	0.008	0.0008
s_041-HLH-001	1	Case	97.7	chr2.169175258	G	A	P3568L	LDL-receptor class A 27	28.9	0.001	0	0	HLHS (MA/AA)
s_3595-ST-0521	1	Control	98	chr2.169170643	T	A	E3763V	LDL-receptor class A 32	32	0.025	0.004	0.044
s_3595-ST-1063	1	Control	98.2	chr2.169170643	T	A	E3763V	LDL-receptor class A 32	32	0.025	0.004	0.044
s_3595-ST-0212	1	Control	99	chr2.169173963	T	C	D3657G	LDL-receptor class A 29	29.4	0	0	0
s_3595-ST-0052	1	Control	98.6	chr2.169174023	G	A	P3637L	LDL-receptor class A 29	26.8	0.016	0.004	0.03
s_048-HLH-001	1	Case	98.4	chr2.169185735	T	C	N3205D	NO	27.8	0.414	0.076	0.42	HLHS (MS/AS), HF
s_3595-ST-0259	1	Control	99	chr2.169177914	T	C	R3428G	LDL-receptor class B 32	26.6	0.016	0.008	0.03
s_3595-ST-0885	1	Control	99.5	chr2.169181539	T	G	I3360L	LDL-receptor class B 30	25.3	0.0004	0	0.0009
s_049-HLH-001	1	Case	55	chr2.169181587	C	T	A3344T	LDL-receptor class B 30	28.4	0.056	0.56	0.006	HLHS (MA/AA), HF
s_052-HLH-001	1	Case	98.7	chr2.169166027	C	T	R3888H	LDL-receptor class A 35	35	0.095	0.7	0.03	AVC, HLV
s_074-HLH-001	1	Case	98.3	chr2.169239752	T	C	N1357D	NO	24.6	0	0	0	HLHS (MS/AS), HF
s_3595-ST-0182	1	Control	99.1	chr2.169185731	C	T	R3206H	NO	35	0.124	0.008	0.17
s_3595-ST-0667	1	Control	98.3	chr2.169185731	C	T	R3206H	NO	35	0.124	0.008	0.17
s_3595-ST-1000	1	Control	98.1	chr2.169185731	C	T	R3206H	NO	35	0.124	0.008	0.17
s_078-HLH-001	1	Case	99	chr2.169182251	C	T	R3305H	LDL-receptor class B 29	26	0.391	0.024	0.016	HLHS (MS/AS)
s_081-HLH-001	1	Case	87.4	chr2.169170643	T	A	E3763V	LDL-receptor class A 32	32	0.025	0.004	0.044	HLHS (MS/AS)
s_104-HLH-001	1	Case	96.4	chr2.169275042	G	A	P657S	NO	29.2	0	0	0	HLHS (MA/AA)
s_112-HLH-001	1	Case	99.1	chr2.169185735	T	C	N3205D	NO	27.8	0.414	0.076	0.42	HLHS (MA/AS)
s_3595-ST-0144	1	Control	98.1	chr2.169185735	T	C	N3205D	NO	27.8	0.414	0.076	0.42
s_3595-ST-0538	1	Control	98.3	chr2.169185735	T	C	N3205D	NO	27.8	0.414	0.076	0.42
s_3595-ST-0711	1	Control	98.6	chr2.169185735	T	C	N3205D	NO	27.8	0.414	0.076	0.42
s_3595-ST-0811	1	Control	97.8	chr2.169185735	T	C	N3205D	NO	27.8	0.414	0.076	0.42
s_3595-ST-0908	1	Control	99.2	chr2.169185735	T	C	N3205D	NO	27.8	0.414	0.076	0.42
s_3595-ST-0137	1	Control	99.3	chr2.169198906	G	T	R2820S	NO	24.6	0.043	0.04	0.08
s_3595-ST-0245	1	Control	98.3	chr2.169198906	G	T	R2820S	NO	24.6	0.043	0.04	0.08
s_3595-ST-1082	1	Control	98.6	chr2.169198906	G	T	R2820S	NO	24.6	0.043	0.04	0.08
s_3595-ST-0076	1	Control	98.5	chr2.169207046	C	T	R2225Q	LDL-receptor class B 21	28.1	0.002	0	0
s_3595-ST-0237	1	Control	99.2	chr2.169212105	C	A	G2048V	NO	34	0	0	0
s_3595-ST-0503	1	Control	97.4	chr2.169212114	C	G	C2045S	NO	29.5	0.0004	0	0.0009
s_3595-ST-0230	1	Control	98.3	chr2.169238104	G	A	T1498M	LDL-receptor class B 9	31	0.001	0	0.002
s_158-HLH-001	1	Case	98	chr2.169168569	C	T	D3869N	LDL-receptor class A 34	35	0.003	0	0.005	HLHS (MS/AA)
s_3595-ST-0239	1	Control	98.1	chr2.169241311	C	A	G1241V	LDL-receptor class A 13	26.5	0.007	0.004	0.01
s_3595-ST-0344	1	Control	99	chr2.169241311	C	A	G1241V	LDL-receptor class A 13	26.5	0.007	0.004	0.01
s_3595-ST-0367	1	Control	98.4	chr2.169256129	G	T	P916Q	LDL-receptor class B 8	32	0.0004	0	0.0009
s_3595-ST-0813	1	Control	98.5	chr2.169259082	C	T	R819H	LDL-receptor class B 6	31	0.105	0.98	0.005
s_188-HLH-001	1	Case	64.7	chr2.169185735	T	C	N3205D	NO	27.8	0.414	0.076	0.42	MA, HLV, DORV
s_188-HLH-001	1	Case	64.7	chr2.169280448	G	A	R415W	NO	25.3	0.004	0.008	0.0008	MA, HLV, DORV
