# Supplementary figures and images for: Patient-specific genomics and cross-species functional analysis implicate LRP2 in hypoplastic left heart syndrome
Source: eLife journal article supplement (doi:10.7554/elife.59554), 2020-10-02

Day 25

□ Mother  
▒ Father  
■ Proband

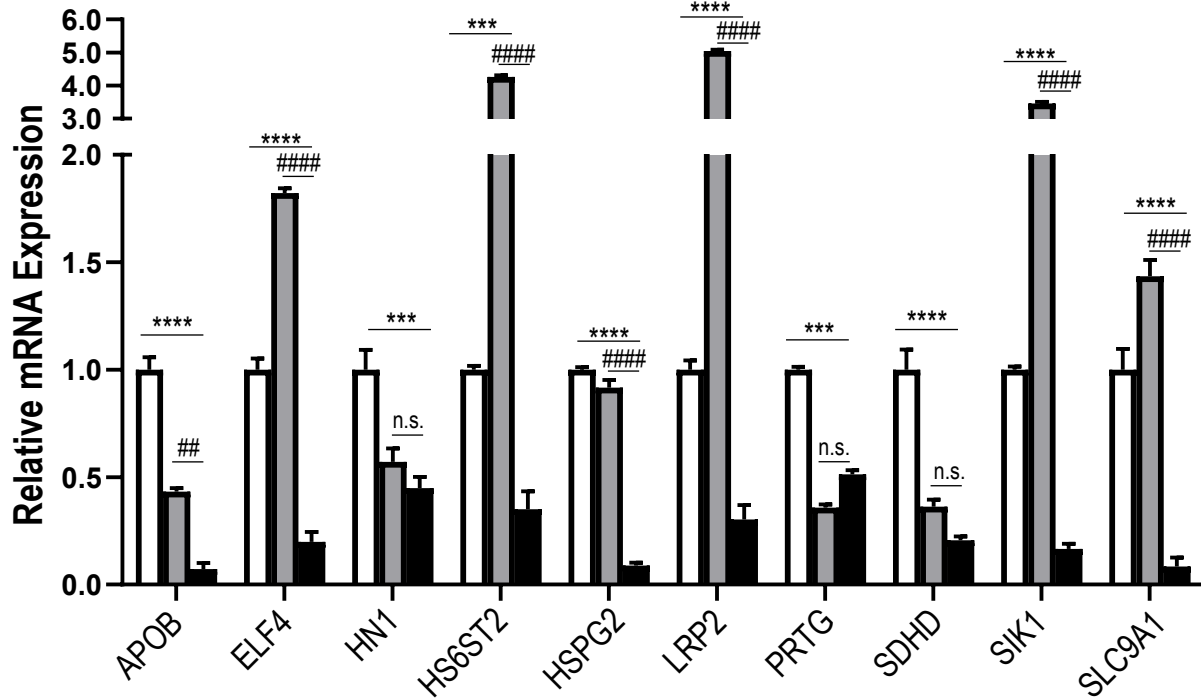

Supplement: supp [file elife-59554-supp-v1.zip]

**A**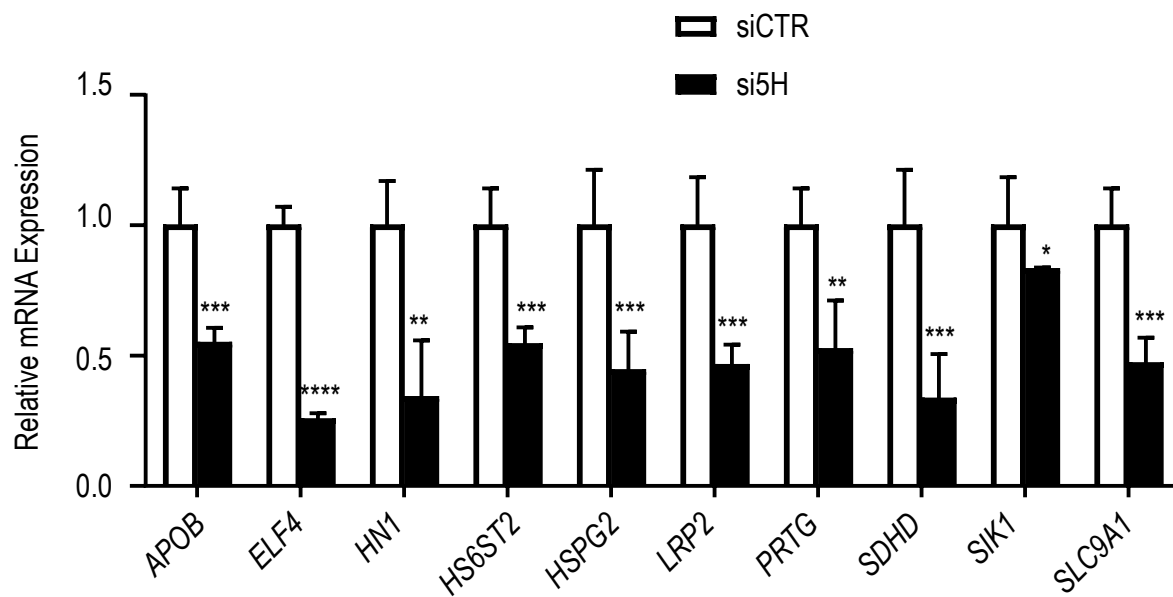**B**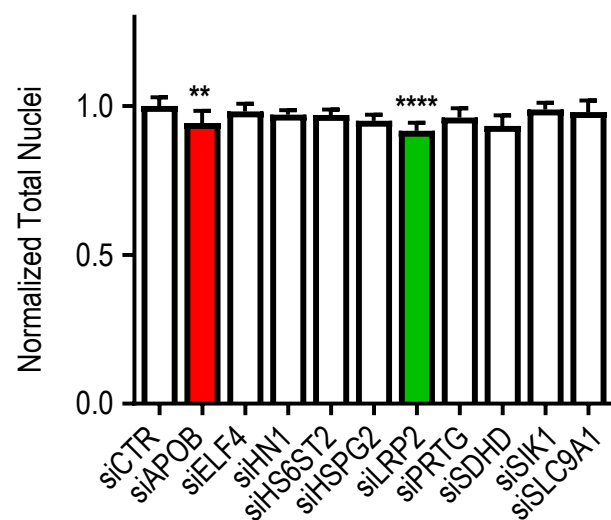**C**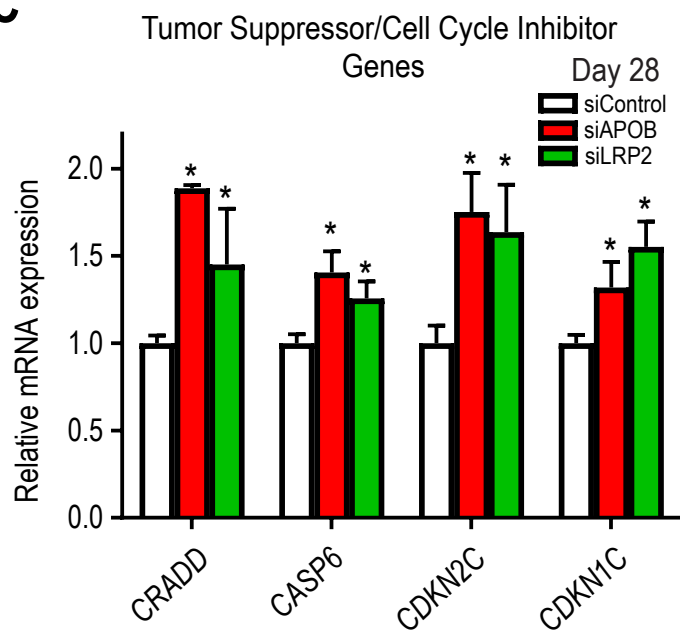**D**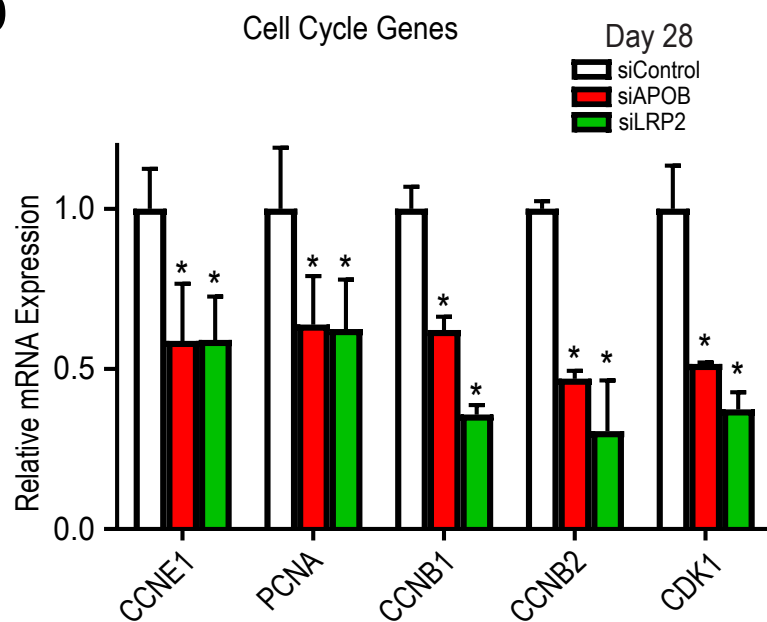

Supplement: supp [file elife-59554-supp-v1.zip]

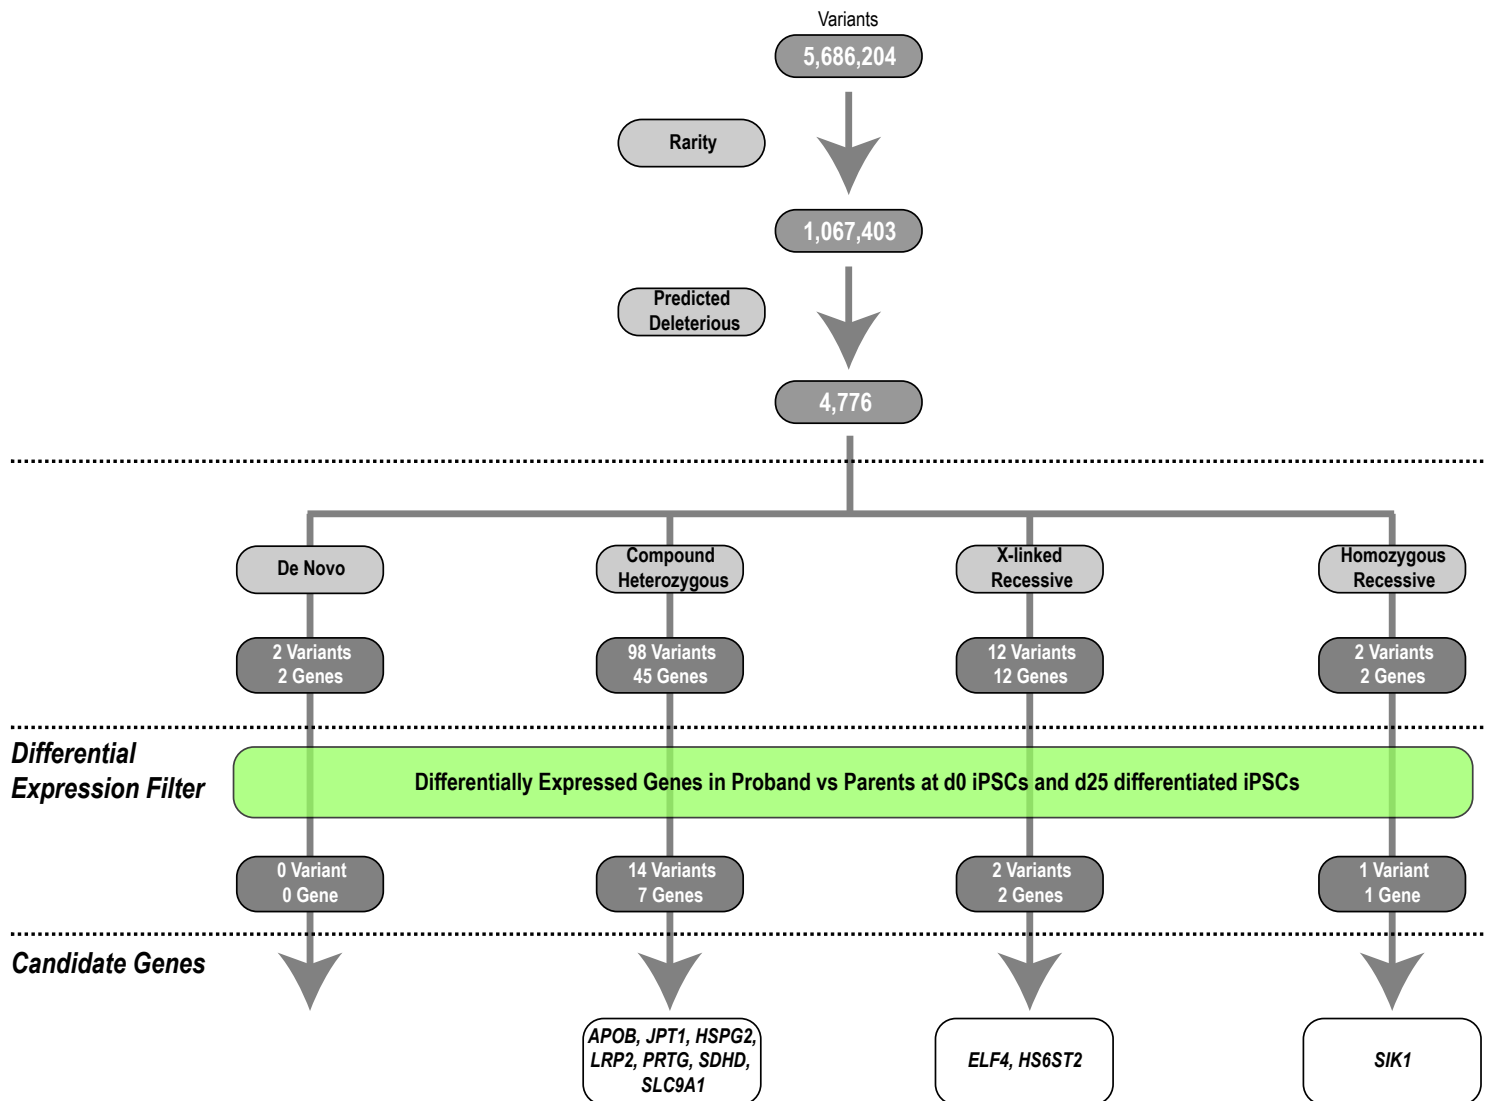

Supplement: supp [file elife-59554-supp-v1.zip]

**A**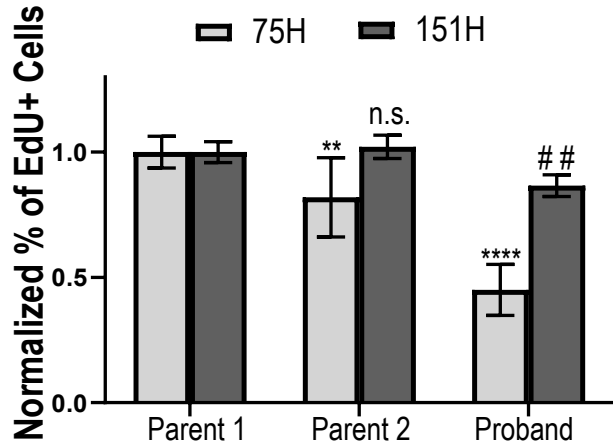**B**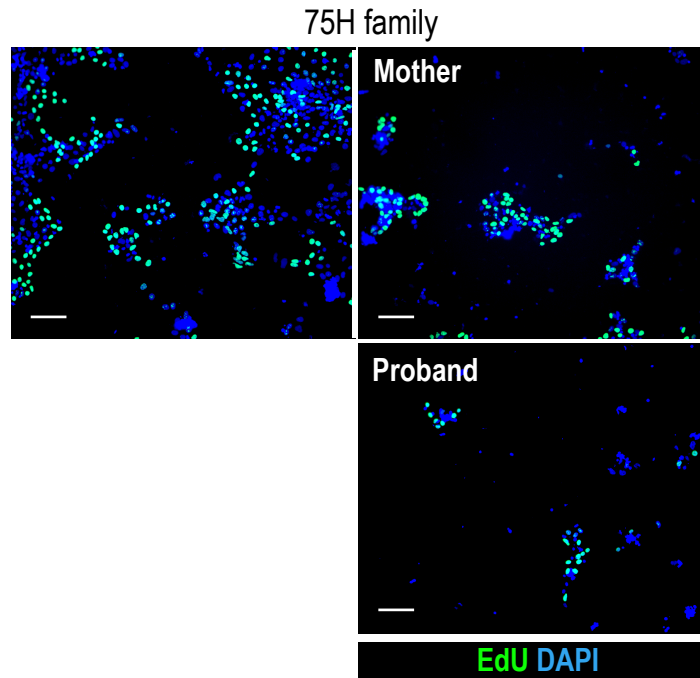

Supplement: supp [file elife-59554-supp-v1.zip]
